# Supplementary material for: Weak population structure in the ant Formica fusca
Source: PeerJ. 2018 Jun 19;6:e5024. doi: 10.7717/peerj.5024 (PMC6014328; doi:10.7717/peerj.5024)
Supplement: Supplemental Information 3 [file peerj-06-5024-s003.xlsx]

## Sheet: Sheet1
Population.colony.ind	FL12	FL12b	FE13	FE13b	FE17	FE17b	FE19	FE19b	FL20	FL20b	FE21	FE21b	FY7	FY7b	FY13	FY13b
BAC01.01	101	105	0	0	119	119	182	182	102	104	93	115	228	232	177	179
BAC01.02	101	103	0	0	121	121	182	182	102	102	93	115	228	232	177	177
BAC01.03	101	105	201	207	119	119	182	182	102	102	93	115	232	232	177	179
BAC01.04	101	105	201	201	119	119	182	182	102	102	93	115	228	232	177	179
BAC01.05	101	103	201	207	121	121	182	182	102	102	93	115	228	232	177	177
BAC02.01	101	105	204	207	119	119	182	182	102	102	93	93	228	228	177	177
BAC02.02	101	105	204	207	119	119	182	188	102	102	93	93	228	230	177	177
BAC02.03	101	105	204	207	119	119	182	188	102	102	93	93	228	230	177	177
BAC02.04	0	0	0	0	119	119	182	188	0	0	0	0	228	228	177	177
BAC02.05	101	105	0	0	119	119	182	182	102	102	93	93	228	230	177	177
BAC03.01	101	105	198	201	119	119	182	182	102	102	91	91	228	232	179	179
BAC03.02	101	107	201	204	0	0	182	182	102	120	91	115	232	232	177	179
BAC03.03	101	107	198	204	119	119	182	182	102	120	91	115	232	232	177	179
BAC03.04	0	0	198	201	119	123	182	182	102	102	0	0	0	0	177	179
BAC03.05	101	107	201	204	119	119	182	182	0	0	91	91	0	0	177	179
BAC04.01	105	105	201	207	121	123	182	182	102	102	91	91	228	232	177	177
BAC04.02	101	101	0	0	119	121	182	182	102	102	91	93	232	232	177	179
BAC04.03	101	105	198	201	121	123	182	182	102	102	91	91	0	0	177	177
BAC04.04	101	101	198	207	119	121	182	182	102	102	91	93	228	232	177	179
BAC04.05	101	101	198	207	119	121	174	182	102	102	91	93	228	232	177	179
BAC05.01	101	105	198	201	119	123	182	182	102	102	91	93	228	228	179	179
BAC05.02	101	105	198	201	119	123	182	182	102	102	91	93	228	228	179	179
BAC05.03	101	105	198	201	119	119	182	182	102	102	0	0	0	0	179	179
BAC05.04	101	105	198	201	119	119	182	182	102	102	91	111	0	0	179	179
BAC05.05	101	105	201	201	119	123	182	182	102	102	91	111	228	228	179	179
BAC06.01	107	107	0	0	113	121	174	182	102	102	93	111	228	228	177	177
BAC06.02	105	107	198	201	119	121	182	182	102	102	93	111	228	228	177	177
BAC06.03	107	107	0	0	113	121	182	182	102	102	93	111	228	228	177	177
BAC06.04	105	107	0	0	119	121	182	182	102	102	93	99	228	228	177	177
BAC06.05	107	107	198	201	113	121	182	182	102	102	93	111	228	228	177	177
BAC07.01	101	105	201	201	119	121	182	182	102	102	91	93	228	228	177	177
BAC07.02	101	105	201	201	119	121	182	182	102	102	93	93	228	228	177	177
BAC07.03	101	105	201	201	119	119	182	182	102	102	93	93	0	0	177	177
BAC07.04	101	101	201	201	119	119	182	182	102	102	91	93	228	228	177	177
BAC08.01	105	107	201	204	119	121	182	182	102	102	91	91	228	230	177	177
BAC08.02	105	107	201	201	119	121	182	182	102	102	0	0	228	230	177	177
BAC08.03	105	107	201	204	119	121	182	182	102	102	91	91	228	230	177	177
BAC08.04	105	107	201	201	119	121	182	182	102	102	91	93	228	230	177	177
BAC08.05	105	107	201	201	119	121	182	182	102	102	91	99	228	230	177	177
BAC09.01	105	107	201	201	119	121	182	182	102	102	91	91	228	230	177	177
BAC09.02	105	107	201	201	119	121	182	182	102	102	91	91	228	230	177	177
BAC09.03	105	107	201	201	119	121	182	182	102	102	91	93	228	230	177	177
BAC09.04	105	107	201	204	119	121	182	182	102	102	91	91	228	230	177	177
BAC09.05	105	107	0	0	119	121	182	182	102	102	91	93	228	230	177	177
BAC10.01	101	105	0	0	119	119	182	188	102	102	91	93	228	232	177	179
BAC10.02	101	105	192	204	119	119	182	188	102	102	91	93	228	232	179	179
BAC10.03	101	105	192	201	119	119	182	182	0	0	93	93	228	232	177	177
BAC10.04	0	0	192	201	119	119	182	182	0	0	91	91	228	232	177	177
BAC11.01	101	105	0	0	119	121	182	182	102	102	91	111	0	0	179	179
BAC11.02	0	0	0	0	119	121	182	182	0	0	0	0	228	232	177	179
BAC11.03	105	105	201	204	119	121	182	182	102	102	91	91	228	232	177	179
BAC11.04	105	105	198	204	113	121	182	182	102	104	91	91	228	232	177	179
BAC11.05	101	105	198	207	119	119	182	182	102	102	91	111	232	232	179	179
BAC12.01	101	105	0	0	119	123	182	182	102	102	93	93	228	230	177	177
BAC12.02	105	105	198	207	119	123	182	182	102	110	93	93	228	228	177	177
BAC12.03	105	105	198	207	119	119	182	182	102	110	93	93	228	228	177	177
BAC12.04	101	105	204	207	119	119	182	182	102	102	93	93	228	228	177	177
BAC12.05	101	105	0	0	119	119	182	182	102	110	93	93	228	228	177	177
BAC13.01	101	105	189	204	123	123	182	182	102	102	93	93	228	228	179	179
BAC13.02	101	105	198	204	119	123	182	182	102	102	91	91	228	228	179	179
BAC13.03	0	0	201	204	123	123	182	182	0	0	91	91	228	228	179	179
BAC13.04	101	105	189	204	123	123	182	182	102	102	93	93	228	228	179	179
BAC13.05	101	105	201	204	123	123	182	182	102	102	91	91	228	228	179	179
BAC14.01	101	101	192	201	119	119	182	182	102	104	91	93	228	232	177	177
BAC14.02	101	101	198	201	119	119	174	182	102	104	91	91	228	232	177	177
BAC14.03	101	101	0	0	119	119	182	182	0	0	91	91	228	232	177	177
BAC14.04	101	101	192	201	119	119	182	182	102	104	91	93	228	232	177	177
BAC14.05	101	105	198	201	119	119	182	182	102	104	91	93	228	232	177	177
BAC15.01	101	107	198	198	119	119	174	182	102	102	0	0	228	228	177	177
BAC15.02	101	105	198	198	119	119	174	182	102	102	0	0	228	228	177	177
BAC15.03	101	105	0	0	119	119	174	182	102	102	91	91	228	228	177	179
BAC15.04	101	107	0	0	119	119	174	182	102	102	91	91	228	228	177	177
BAC15.05	101	107	0	0	119	119	174	182	102	102	91	91	228	228	177	177
BYV01.01	101	105	201	201	119	125	182	182	102	110	0	0	228	230	177	177
BYV01.02	101	105	201	201	119	125	182	182	102	110	91	115	228	230	177	177
BYV01.03	101	105	201	216	123	125	182	182	102	102	0	0	228	230	177	177
BYV01.04	101	105	201	201	119	125	182	182	102	102	91	115	228	230	177	177
BYV01.05	101	105	201	201	123	125	182	182	102	102	91	93	228	230	177	177
BYV02.01	105	107	201	207	119	119	186	186	102	102	91	93	228	230	177	177
BYV02.02	105	107	198	207	119	119	182	186	102	102	91	93	228	230	177	179
BYV02.03	101	107	198	207	119	119	186	186	102	102	91	91	228	228	177	177
BYV02.04	101	107	201	207	119	119	182	186	102	102	91	93	228	228	177	179
BYV02.05	105	107	201	207	119	119	186	186	102	102	91	93	228	230	0	0
BYV03.01	105	107	198	198	119	121	182	188	102	104	91	91	228	230	177	177
BYV03.02	105	107	198	207	119	121	182	188	102	104	91	91	228	230	177	179
BYV03.03	105	107	198	198	113	119	182	188	102	104	91	91	228	230	177	177
BYV03.04	105	107	198	198	113	119	182	188	102	104	91	91	228	230	177	179
BYV03.05	105	107	198	207	119	121	182	188	102	104	91	91	228	230	177	177
BYV04.01	101	101	198	201	119	119	182	182	102	102	0	0	228	228	177	177
BYV04.02	101	105	201	204	119	119	182	182	102	102	0	0	228	228	177	177
BYV04.03	101	105	198	201	119	119	182	182	102	102	0	0	228	228	177	177
BYV04.04	97	101	201	204	119	119	182	182	102	102	0	0	228	228	177	177
BYV04.05	101	105	198	201	119	119	182	182	102	102	0	0	228	228	177	177
BYV05.01	101	103	201	201	119	121	182	182	102	102	93	93	228	228	177	177
BYV05.02	101	103	201	201	121	123	182	182	102	102	91	93	228	228	177	177
BYV05.03	103	105	201	201	119	121	182	182	102	102	93	93	228	228	177	177
BYV05.04	101	103	201	201	119	121	182	182	102	102	91	93	228	228	177	179
BYV05.05	103	105	201	201	119	121	182	182	102	102	93	93	228	228	177	177
BYV06.01	101	105	0	0	0	0	182	182	102	102	93	93	0	0	177	179
BYV06.04	101	105	0	0	119	121	182	182	102	102	93	93	228	230	177	179
BYV08.01	101	105	198	207	119	121	182	188	102	102	93	115	228	228	177	179
BYV08.02	101	105	201	207	119	121	182	188	102	102	93	93	228	228	177	179
BYV08.03	101	105	198	207	119	121	182	188	102	102	93	115	228	228	177	179
BYV08.04	101	105	201	207	119	121	182	188	102	112	93	93	228	228	177	179
BYV08.05	101	101	0	0	119	121	182	188	102	102	93	115	228	228	177	179
BYV09.01	0	0	198	210	119	119	182	188	0	0	0	0	228	232	177	177
BYV09.02	101	101	198	207	119	121	182	188	102	102	93	93	228	230	177	177
BYV09.03	101	105	201	210	119	119	182	188	102	102	91	93	228	232	177	177
BYV09.04	101	101	198	210	119	119	182	188	102	102	91	93	228	228	177	177
BYV09.05	101	101	0	0	119	119	182	188	102	102	0	0	228	232	177	177
FOR01.01	105	105	198	198	119	119	182	182	102	102	93	93	228	228	177	177
FOR01.02	105	105	0	0	119	119	182	182	102	102	93	93	228	228	177	177
FOR01.03	105	105	0	0	119	119	182	182	102	102	93	93	228	228	177	179
FOR01.04	105	105	0	0	119	119	182	182	102	102	93	115	228	228	177	179
FOR01.05	105	105	0	0	119	119	182	182	102	102	93	115	0	0	177	177
FOR02.01	101	101	0	0	113	119	182	182	102	102	93	93	228	228	177	177
FOR02.02	101	101	198	207	113	119	182	182	102	108	93	93	228	228	177	177
FOR02.03	101	101	0	0	113	119	182	182	102	102	93	93	228	228	177	177
FOR02.04	101	101	0	0	113	119	182	182	102	110	93	93	228	228	177	177
FOR02.05	101	101	207	207	113	119	182	182	102	110	93	93	228	228	177	177
FOR03.01	101	105	198	207	123	123	182	182	102	102	91	93	230	232	177	177
FOR03.02	101	105	201	201	113	119	182	182	102	102	91	93	232	232	177	177
FOR03.03	101	105	201	201	113	119	182	182	102	102	93	93	232	232	177	179
FOR03.04	101	105	201	207	113	119	182	182	102	120	91	93	232	232	177	179
FOR03.05	101	105	201	201	119	119	182	182	102	120	91	93	232	232	177	177
FOR04.01	101	105	201	204	119	119	182	182	102	102	91	93	228	228	177	177
FOR04.02	101	105	0	0	119	119	182	188	102	102	91	93	228	228	177	177
FOR04.03	105	105	0	0	119	119	0	0	102	102	91	93	228	228	177	177
FOR04.05	101	105	201	201	119	119	182	182	102	102	91	93	228	228	0	0
FOR05.01	105	105	201	201	113	119	182	182	0	0	0	0	232	232	177	179
FOR05.02	105	105	198	201	119	119	174	182	102	102	93	93	232	232	177	179
FOR05.03	101	105	0	0	119	119	174	182	102	102	93	93	0	0	177	179
FOR05.04	105	105	0	0	119	119	174	182	102	102	93	93	0	0	177	179
FOR05.05	105	105	198	201	119	119	174	182	102	102	93	93	0	0	177	179
GRA01.02	101	105	0	0	119	123	182	182	102	104	0	0	228	228	177	177
GRA01.03	101	105	0	0	119	119	174	182	102	104	0	0	230	230	177	177
GRA01.04	101	101	0	0	121	123	182	182	102	104	93	93	228	230	177	177
GRA01.05	101	105	0	0	119	119	182	182	102	102	91	93	0	0	177	179
GRA02.01	101	101	0	0	119	119	182	182	102	108	91	91	0	0	177	179
GRA02.02	101	101	189	198	119	119	182	182	102	102	93	109	230	230	177	179
GRA02.03	101	101	198	201	119	119	182	182	102	108	93	109	230	230	177	179
GRA02.04	101	101	198	201	119	119	182	182	102	102	93	109	228	230	177	179
GRA02.05	101	101	0	0	119	119	182	182	102	102	93	93	230	230	177	179
GRA03.01	101	105	0	0	119	119	182	182	100	102	91	91	228	230	177	177
GRA03.02	101	105	0	0	119	119	182	182	100	102	91	91	0	0	177	179
GRA03.03	101	105	0	0	119	119	182	182	100	102	91	93	228	228	177	177
GRA03.04	101	105	0	0	119	119	182	182	100	102	91	93	0	0	177	177
GRA03.05	101	105	201	207	119	119	182	182	100	102	91	93	228	230	177	179
GRA04.01	101	105	201	201	119	119	182	182	102	102	91	93	228	228	177	179
GRA04.02	101	105	201	201	119	119	182	182	102	102	91	93	228	228	177	179
GRA04.03	101	105	201	201	119	119	182	182	102	102	91	93	228	230	177	177
GRA04.04	101	105	201	201	119	119	182	182	102	102	91	93	228	228	177	177
GRA05.01	101	105	201	204	119	121	182	182	102	102	91	91	228	228	177	179
GRA05.02	101	105	201	204	119	121	182	182	102	102	91	91	228	228	177	179
GRA05.03	101	105	0	0	119	121	182	188	102	102	91	91	228	228	177	179
GRA05.04	101	105	0	0	119	119	182	188	102	102	91	91	228	228	177	179
GRA05.05	101	105	201	201	119	121	182	188	102	102	91	91	228	228	177	179
GRA06.01	101	101	0	0	119	119	182	182	102	104	0	0	0	0	177	179
GRA06.03	101	101	0	0	119	119	182	182	102	104	93	93	228	228	177	179
GRK01.01	101	105	0	0	119	121	174	182	102	102	91	115	0	0	177	179
GRK01.02	101	105	198	198	119	121	182	182	102	102	91	115	0	0	177	179
GRK01.03	101	105	0	0	119	121	182	182	102	102	0	0	0	0	177	179
GRK01.04	101	105	0	0	119	121	174	182	102	102	91	115	0	0	177	179
GRK01.05	101	105	0	0	119	121	182	182	102	102	91	115	0	0	177	179
GRK02.01	105	107	0	0	119	121	182	182	102	102	91	111	228	228	177	179
GRK02.02	105	105	0	0	119	121	182	182	102	108	91	111	228	228	177	179
GRK02.03	105	107	0	0	119	121	182	182	102	108	93	111	228	228	177	179
GRK02.04	105	105	0	0	119	121	182	182	102	102	91	111	228	228	177	179
GRK02.05	105	105	0	0	119	121	182	182	102	108	91	111	228	228	177	179
GRK03.01	105	105	198	207	119	121	182	182	102	102	91	111	228	232	177	177
GRK03.02	105	105	192	207	119	121	182	182	102	102	91	111	228	228	177	177
GRK03.03	101	105	192	207	119	121	182	182	102	102	93	111	0	0	177	177
GRK03.04	101	105	192	207	119	121	182	182	102	102	93	111	228	230	177	177
GRK03.05	101	105	192	207	119	121	182	182	102	102	91	111	228	230	177	179
GRK04.01	101	105	0	0	119	119	182	182	108	108	0	0	0	0	177	177
GRK04.02	101	105	0	0	119	119	182	182	102	108	0	0	228	228	177	177
GRK04.03	101	105	195	195	119	119	182	182	102	108	0	0	228	228	177	179
GRK04.04	101	105	0	0	119	119	182	182	102	108	0	0	228	228	177	179
GRK04.05	101	105	0	0	119	119	182	182	0	0	0	0	0	0	177	177
GRK05.01	101	101	0	0	119	119	182	182	102	102	0	0	228	228	179	179
GRK05.02	101	101	201	204	119	121	182	182	102	102	91	93	228	228	179	179
GRK05.04	101	101	0	0	119	121	182	182	102	102	0	0	0	0	179	179
GRK05.05	101	101	0	0	119	119	182	182	102	102	93	93	228	228	179	179
GRK06.01	105	105	0	0	119	123	182	182	102	108	91	93	228	228	177	179
GRK06.04	105	105	0	0	119	123	182	182	102	102	91	93	228	228	177	179
HAN01.01	105	107	201	204	119	123	174	182	102	108	91	91	0	0	177	177
HAN01.02	103	105	204	204	119	123	182	184	102	106	91	91	0	0	177	177
HAN01.03	105	107	201	204	119	123	174	182	102	102	91	93	228	230	177	177
HAN01.04	105	107	201	216	119	123	174	182	102	102	91	93	228	230	177	177
HAN01.05	103	105	204	204	119	123	182	184	102	106	91	93	228	230	177	177
HAN02.01	101	103	192	204	113	119	182	182	102	102	91	91	228	228	177	179
HAN02.02	101	103	192	201	113	119	182	182	102	102	91	93	228	230	179	179
HAN02.03	101	103	192	201	113	119	182	188	102	102	91	93	228	228	177	179
HAN02.04	101	103	192	201	113	119	182	182	102	102	91	93	228	230	177	179
HAN02.05	101	103	192	201	113	119	182	182	102	102	91	93	228	230	177	179
HAN03.02	105	107	0	0	119	119	182	182	102	102	93	93	0	0	177	179
HAN03.04	105	107	192	192	119	123	182	182	102	102	93	93	228	230	177	179
HAN03.05	101	105	0	0	119	123	182	182	102	102	93	93	0	0	177	179
HAN04.01	101	101	0	0	0	0	182	182	102	102	91	93	0	0	0	0
HAN04.02	101	105	0	0	119	119	182	182	102	102	93	93	0	0	177	179
HAN04.03	101	105	0	0	119	119	182	182	102	102	91	93	0	0	177	179
HAN07.01	105	107	0	0	119	119	182	188	102	102	91	93	232	232	177	179
HAN07.02	105	105	219	219	0	0	182	188	102	102	91	93	228	230	177	179
HAN07.03	105	105	198	198	0	0	182	182	102	104	91	91	228	232	177	177
HAN07.04	101	105	198	207	119	119	174	182	102	104	91	91	230	232	177	177
HAN07.05	101	105	0	0	119	119	182	182	102	102	91	91	226	232	179	179
HAN08.01	101	101	192	210	119	123	182	182	102	110	93	93	0	0	177	177
HAN08.02	101	103	192	204	119	123	182	182	102	110	93	111	228	228	177	177
HAN08.03	101	103	192	204	119	123	182	182	102	110	93	111	228	228	177	177
HAN08.04	101	103	0	0	119	123	182	182	102	110	93	93	228	228	177	177
HAN08.05	101	101	0	0	119	123	182	182	102	110	93	93	0	0	177	177
LAN01.01	105	105	201	204	119	119	182	182	102	104	93	111	232	232	177	177
LAN01.02	101	105	198	201	119	119	182	182	102	110	93	111	228	232	177	177
LAN01.03	101	105	198	201	113	119	182	182	102	104	91	93	228	232	177	177
LAN01.04	105	105	198	201	113	119	182	182	102	110	91	93	232	232	177	177
LAN01.05	105	105	198	201	113	119	182	182	102	110	93	111	228	232	177	177
LAN02.01	101	105	198	207	119	121	182	182	102	108	91	93	228	228	177	177
LAN02.02	101	105	198	198	119	121	182	182	108	108	91	93	228	228	177	177
LAN02.03	101	105	198	198	121	121	182	182	102	108	91	91	228	228	177	179
LAN02.04	101	105	198	207	119	121	182	182	102	108	91	91	228	228	177	179
LAN02.05	101	105	198	207	121	121	182	182	108	108	91	91	228	228	177	179
LAN03.01	101	103	198	207	119	119	182	182	104	108	93	111	228	230	177	177
LAN03.02	101	101	198	207	119	119	182	182	102	108	93	111	228	230	177	177
LAN03.03	101	101	198	207	119	119	182	182	104	108	93	111	230	230	177	177
LAN03.04	101	101	198	207	119	121	182	182	102	108	93	111	230	230	177	177
LAN03.05	101	103	198	207	119	121	182	182	102	108	0	0	230	230	177	177
LAN04.01	101	103	192	204	119	119	182	188	102	102	93	111	228	228	177	177
LAN04.02	101	101	0	0	119	119	182	184	102	110	93	111	230	232	177	179
LAN04.03	103	105	204	207	119	119	182	188	102	108	93	111	228	228	177	177
LAN04.04	101	103	204	207	119	119	182	182	102	108	93	111	228	228	177	177
LAN04.05	103	105	0	0	119	119	182	188	102	102	93	111	228	228	177	179
LAN05.01	101	105	201	207	119	123	182	182	102	110	91	93	228	228	179	179
LAN05.02	101	105	0	0	119	123	182	182	102	110	91	93	228	228	177	179
LAN05.03	101	105	0	0	119	123	182	182	102	110	91	91	228	232	179	179
LAN05.04	101	101	0	0	119	119	182	182	102	110	91	91	228	228	177	179
LAN06.01	105	105	192	198	119	119	182	182	102	102	93	93	228	230	177	179
LAN06.02	105	105	192	198	119	119	182	182	102	102	93	93	228	230	177	179
LAN06.03	105	105	192	198	119	119	182	182	102	102	93	93	228	230	177	179
LAN06.04	105	105	192	198	119	119	182	182	102	102	93	93	230	230	177	179
LAN06.05	105	105	192	201	119	119	182	182	102	102	93	93	228	230	177	179
LAN07.01	101	101	0	0	119	119	174	182	102	102	91	93	228	230	177	179
LAN07.02	105	105	201	201	113	119	182	182	102	102	91	93	228	232	177	179
LAN07.03	101	101	192	204	119	121	182	182	102	102	91	93	228	230	177	179
LAN07.04	101	101	189	204	119	121	182	182	102	102	91	93	228	230	177	179
LAN08.01	0	0	201	201	119	119	182	182	102	102	93	93	228	228	179	179
LAN08.02	101	105	201	201	119	119	182	182	102	102	91	93	228	228	177	179
LAN08.03	101	105	201	213	119	119	182	182	102	102	93	93	228	228	179	179
LAN08.04	105	105	201	201	119	123	182	182	102	102	93	93	228	228	177	179
LAN09.01	101	105	0	0	119	119	182	182	102	102	93	93	228	228	177	179
LAN09.02	101	105	0	0	119	123	182	182	102	102	91	93	228	228	179	179
LAN09.03	105	105	201	213	119	119	182	182	102	102	91	93	228	228	177	179
LAN09.04	105	105	201	201	119	119	182	182	102	102	91	93	228	228	177	179
LAN09.05	101	105	201	201	119	119	182	182	102	102	91	93	228	228	179	179
LAN10.01	105	105	201	207	119	121	174	182	102	102	93	115	228	228	179	179
LAN10.02	101	105	201	207	119	133	174	188	102	102	111	111	228	228	177	179
LAN10.03	101	105	201	207	119	133	174	188	102	102	111	111	228	228	177	179
LAN10.04	101	105	201	201	119	119	174	182	102	102	111	115	228	228	177	177
LAN10.05	101	105	201	201	119	133	174	182	102	102	111	111	228	228	177	179
MAT01.01	103	107	198	204	119	125	182	182	102	110	91	93	228	230	177	179
MAT01.02	101	105	198	201	119	121	182	188	102	102	91	91	228	230	177	177
MAT01.03	103	105	198	201	119	119	182	188	102	104	91	91	228	230	177	177
MAT01.04	103	105	198	201	119	119	182	188	102	104	91	91	228	230	177	177
MAT01.05	103	105	198	201	119	119	182	182	102	102	91	91	228	230	177	177
MAT02.01	101	105	183	198	119	119	182	182	102	102	91	93	228	230	177	179
MAT02.02	101	105	183	198	119	119	182	182	102	106	91	93	228	230	177	177
MAT02.03	101	105	189	198	119	119	182	182	102	102	91	93	228	230	177	177
MAT02.04	101	105	189	216	119	119	174	182	102	102	91	93	228	230	177	179
MAT02.05	101	105	189	198	119	119	182	182	102	102	91	91	228	230	177	179
MAT03.01	105	105	198	198	113	119	182	182	102	102	91	93	230	232	177	177
MAT03.02	101	101	198	201	119	123	182	182	102	108	93	93	232	232	177	177
MAT03.03	101	105	198	201	119	119	182	182	102	102	91	91	232	232	177	177
MAT03.04	105	105	198	201	119	119	182	182	102	102	91	91	232	232	177	177
MAT03.05	105	105	0	0	119	119	182	182	102	102	91	91	230	232	177	177
MAT04.01	105	107	189	198	119	119	182	182	104	106	93	93	228	232	179	179
MAT04.02	101	105	201	201	119	123	182	182	102	102	91	93	228	232	177	177
MAT04.03	101	105	201	201	113	119	182	182	102	102	91	91	228	232	177	177
MAT04.04	105	105	201	201	119	119	182	182	102	102	91	93	232	232	177	177
MAT04.05	105	105	201	201	119	119	182	182	102	102	91	93	232	232	177	177
MAT05.01	101	105	201	213	0	0	182	182	102	104	93	93	228	228	179	179
MAT05.02	101	105	201	213	119	121	182	182	102	104	93	93	228	228	179	179
MAT05.03	101	105	204	213	119	121	182	182	102	104	93	93	228	228	179	179
MAT05.04	101	105	204	213	0	0	182	182	102	104	93	93	228	230	179	179
MAT05.05	101	105	204	213	119	121	182	182	102	104	93	93	228	230	179	179
MAT06.01	101	105	0	0	119	123	182	182	102	102	91	91	0	0	177	179
MAT06.02	101	105	0	0	119	123	182	182	102	102	91	93	228	232	177	177
MAT06.03	101	105	0	0	0	0	182	182	0	0	0	0	228	232	177	179
MAT06.04	101	105	0	0	119	119	182	182	102	102	91	91	228	232	177	179
MAT06.05	101	101	192	198	121	123	182	182	102	102	91	91	228	232	177	179
MAT07.01	101	105	198	201	119	119	182	182	102	104	91	91	228	232	177	179
MAT07.02	105	105	198	207	113	123	182	182	102	102	93	93	232	232	177	177
MAT07.03	0	0	201	213	119	121	182	182	0	0	0	0	232	232	177	177
MAT07.04	101	101	198	201	119	121	182	182	100	102	91	91	228	232	177	177
MAT08.01	105	107	0	0	119	119	182	182	102	102	91	115	230	232	177	177
MAT08.02	101	101	198	204	119	125	182	188	0	0	91	91	228	232	177	179
MAT08.03	105	105	201	201	113	119	182	182	102	102	93	93	228	230	177	179
MAT08.04	105	107	198	201	119	121	182	182	102	102	93	93	228	232	177	179
MAT08.05	105	105	201	204	119	121	182	184	102	102	91	93	230	232	177	179
MAT09.01	101	103	0	0	0	0	182	188	104	104	93	111	228	228	177	179
MAT09.02	101	105	0	0	123	123	182	188	102	104	0	0	228	228	177	179
MAT09.03	101	105	198	201	119	123	182	188	104	104	91	111	228	228	177	179
MAT09.04	101	103	192	198	119	123	182	188	102	104	93	111	228	228	177	179
MAT10.01	103	105	201	207	119	119	182	188	102	102	91	93	228	232	177	177
MAT10.02	101	103	192	201	119	119	182	182	102	102	91	93	0	0	0	0
MAT10.03	101	101	201	201	121	123	182	182	102	102	93	93	230	232	177	177
MAT10.04	103	105	0	0	119	123	182	182	102	102	91	91	228	232	177	179
MAT10.05	101	103	192	201	119	119	182	182	102	102	91	93	228	232	177	179
MAT12.01	105	107	0	0	119	119	182	182	102	102	91	93	230	232	177	179
MAT12.02	101	105	201	201	119	121	182	182	102	108	91	93	230	232	177	179
MAT12.03	101	105	201	204	119	121	182	182	108	110	91	93	230	232	177	177
MAT12.04	105	107	201	201	119	119	182	188	102	102	91	93	230	232	177	179
MAT13.01	101	105	201	201	119	119	182	184	102	104	91	93	228	230	177	179
MAT13.02	101	105	201	201	123	123	182	184	102	104	91	93	228	230	177	179
MAT13.03	101	101	201	201	0	0	182	184	102	104	91	93	0	0	177	177
MAT14.01	101	101	0	0	119	123	182	182	102	108	93	93	0	0	177	179
MAT14.02	101	105	0	0	119	119	182	186	102	102	91	93	228	232	179	179
MAT14.03	101	107	201	207	119	123	182	182	102	104	91	93	228	232	177	177
MAT14.04	101	105	0	0	119	121	182	186	0	0	0	0	0	0	177	177
MAT14.05	0	0	198	198	119	123	182	182	0	0	0	0	232	232	177	179
MOS06.01	105	107	201	201	119	119	174	182	110	110	111	111	228	232	177	177
MOS06.02	105	105	0	0	119	121	182	188	102	108	91	111	228	232	177	177
MOS06.03	105	105	198	201	119	119	174	182	102	108	91	111	228	232	177	177
MOS06.04	105	105	198	201	119	121	182	188	102	108	91	111	228	232	177	177
MOS06.05	105	107	201	201	119	119	174	182	108	108	93	111	232	232	177	177
MOS07.01	105	105	201	213	119	123	182	188	102	120	91	93	228	232	177	179
MOS07.02	101	101	201	207	113	115	182	182	102	102	91	93	228	228	177	177
MOS07.03	101	101	0	0	115	115	182	184	102	102	91	93	228	230	177	177
MOS07.04	101	101	198	198	0	0	182	182	102	102	91	93	228	228	177	177
MOS07.05	101	101	0	0	115	115	182	182	0	0	93	93	228	228	177	177
MOS10.01	105	105	201	201	119	119	182	182	102	102	91	91	228	232	177	179
MOS10.02	105	105	201	201	119	119	182	182	102	120	91	91	228	232	179	179
MOS10.03	105	105	201	201	119	119	182	182	102	120	91	91	228	232	179	179
MOS10.04	101	101	0	0	119	119	182	188	102	120	93	115	232	232	177	179
MOS10.05	101	101	198	204	119	119	182	188	102	120	93	115	232	232	177	179
OBY01.01	101	105	192	201	121	121	182	182	102	102	91	93	228	228	177	177
OBY01.02	101	105	192	201	119	121	182	182	102	102	91	91	228	228	177	177
OBY01.03	101	105	201	201	119	121	182	182	102	102	91	93	228	228	177	177
OBY01.04	101	105	192	201	121	121	182	182	102	102	91	91	228	228	177	177
OBY01.05	101	105	201	201	121	121	182	182	102	102	91	93	228	228	177	177
OBY02.01	101	101	192	201	119	121	174	182	102	104	91	93	228	230	177	179
OBY02.02	101	101	0	0	119	121	174	182	102	104	91	93	228	228	177	179
OBY02.03	101	101	0	0	119	121	174	174	102	104	91	93	228	228	177	179
OBY02.04	101	101	192	207	119	121	174	174	102	104	91	93	228	228	177	179
OBY02.05	101	101	192	207	119	121	174	182	0	0	91	93	228	230	177	179
OBY04.01	103	105	198	198	121	125	174	182	102	106	93	93	228	228	177	177
OBY04.02	103	105	198	198	121	125	174	182	102	106	93	93	228	228	177	177
OBY04.03	103	105	198	198	121	125	182	182	102	106	93	93	228	228	177	177
OBY04.04	103	105	198	198	121	125	174	182	102	102	93	93	228	228	177	177
OBY04.05	103	105	198	198	113	121	174	182	102	106	93	93	228	228	177	177
OBY05.01	101	101	0	0	119	119	174	182	0	0	93	93	0	0	177	177
OBY05.02	101	101	0	0	119	119	174	182	102	102	93	93	228	230	177	179
OBY05.03	101	101	0	0	119	119	174	182	102	102	0	0	0	0	0	0
OBY05.04	101	101	0	0	119	119	174	182	102	102	93	93	0	0	0	0
OBY05.05	101	101	0	0	119	119	174	182	102	102	93	93	228	228	177	179
OBY06.01	101	105	198	201	119	121	174	182	102	102	91	93	228	228	177	177
OBY06.02	101	105	198	201	119	119	174	182	102	102	91	93	228	228	177	177
OBY06.03	101	105	198	204	119	119	174	182	102	102	91	93	228	228	177	177
OBY06.04	101	105	198	204	119	119	174	182	102	102	91	93	228	228	177	177
OBY06.05	101	105	198	201	119	119	174	182	102	102	91	93	228	228	177	177
OBY08.01	101	105	201	201	119	121	174	188	102	104	91	93	228	228	177	177
OBY08.02	101	105	201	201	119	121	174	188	102	104	91	93	228	228	177	177
OBY08.03	101	105	201	207	119	121	174	182	102	104	91	93	228	228	177	177
OBY08.04	105	105	201	201	113	119	174	188	102	104	91	93	228	228	177	177
POJ01.01	105	107	198	207	119	121	182	188	102	102	91	91	232	232	177	177
POJ01.02	105	107	0	0	119	121	188	188	102	102	91	113	232	232	179	179
POJ01.03	101	105	198	207	119	119	182	186	102	106	0	0	228	232	177	177
POJ01.04	105	107	201	207	119	121	182	186	102	102	91	91	232	232	177	179
POJ01.05	105	107	192	198	119	119	182	186	102	110	91	93	228	232	177	179
POJ02.01	105	105	198	198	121	123	182	182	102	102	93	93	230	232	177	179
POJ02.03	105	105	198	207	119	119	182	182	102	102	93	93	228	232	177	179
POJ02.04	101	105	201	207	121	123	182	182	102	102	93	93	228	232	177	179
POJ02.05	105	105	198	201	119	121	182	182	102	102	91	91	230	232	177	179
POJ03.01	101	107	198	204	119	119	182	184	102	110	91	93	230	230	177	179
POJ03.02	101	107	198	204	119	121	174	184	102	110	91	93	228	230	177	179
POJ03.03	105	107	0	0	119	119	182	184	102	110	91	93	230	230	177	179
POJ03.04	101	107	198	204	119	121	174	184	102	110	93	93	230	230	177	179
POJ04.01	105	107	0	0	119	121	182	182	102	102	93	93	228	228	177	177
POJ04.02	105	107	0	0	119	121	182	182	102	102	93	93	228	228	177	177
POJ04.03	103	105	0	0	119	121	182	182	102	102	0	0	228	228	177	177
POJ04.04	103	105	0	0	121	121	182	182	102	102	93	93	228	232	177	177
POJ04.05	103	105	0	0	121	121	182	182	102	102	93	93	228	228	177	177
POJ05.01	101	105	198	198	119	119	182	182	102	102	91	91	228	228	177	177
POJ05.02	101	105	198	198	119	119	182	182	102	102	91	91	228	228	177	177
POJ05.03	101	101	207	207	113	119	182	182	102	102	93	93	228	228	177	177
POJ05.04	101	101	0	0	113	119	182	182	102	102	93	93	228	228	177	177
POJ06.01	105	105	207	207	119	123	182	182	102	102	0	0	230	232	177	179
POJ06.02	101	105	201	201	113	121	182	182	102	102	93	115	228	232	177	179
POJ06.03	105	105	201	207	121	123	182	182	102	102	93	113	230	232	177	179
POJ06.04	105	105	201	201	121	123	182	182	102	102	93	115	228	228	177	179
POJ06.05	101	101	189	207	119	121	174	182	102	120	93	113	230	232	179	179
POJ07.01	101	105	189	201	119	119	182	186	102	120	91	93	0	0	177	179
POJ07.02	101	105	201	201	119	119	182	186	102	102	91	93	0	0	177	179
POJ07.03	101	105	189	201	119	121	182	186	102	120	91	91	0	0	177	177
POJ07.04	101	105	189	201	119	121	182	186	102	120	91	91	0	0	177	177
POJ07.05	101	101	201	201	119	123	182	182	102	120	91	91	0	0	177	177
POJ08.01	101	107	201	201	119	121	182	186	102	102	93	93	228	232	177	179
POJ08.02	101	105	198	207	121	123	182	186	102	108	91	91	232	232	177	177
POJ08.03	101	105	0	0	119	121	182	186	102	108	91	93	228	232	177	179
POJ08.04	101	105	201	207	121	123	182	188	102	108	91	91	232	232	177	177
POJ08.05	105	105	198	207	121	123	182	186	102	108	91	91	232	232	177	177
POJ09.01	101	105	0	0	119	119	182	182	102	102	91	91	228	232	177	177
POJ09.02	101	101	201	201	113	113	182	182	102	120	91	109	230	232	177	179
POJ09.03	101	105	198	201	119	119	174	182	102	120	91	91	232	232	177	177
POJ09.04	101	105	204	204	113	121	182	182	108	120	91	93	232	232	177	179
POJ09.05	101	105	0	0	113	119	174	182	102	120	91	91	232	232	177	177
SAN01.01	101	105	198	201	119	123	182	182	102	104	91	93	228	230	177	177
SAN01.02	101	107	198	201	119	123	182	182	102	102	93	111	228	228	177	177
SAN01.03	101	107	192	198	119	123	182	182	102	102	91	111	228	228	177	177
SAN01.04	101	107	0	0	119	123	182	182	102	102	91	93	228	228	177	177
SAN01.05	105	107	0	0	119	123	182	182	102	102	91	111	228	228	177	177
SAN02.01	101	105	0	0	119	121	182	182	102	102	91	91	228	230	177	177
SAN02.02	101	105	189	201	119	121	182	182	102	102	91	93	228	230	177	177
SAN02.03	101	105	189	201	119	121	182	182	102	102	91	93	228	230	177	177
SAN02.04	101	105	189	201	119	121	182	182	102	102	91	93	228	230	177	177
SAN02.05	101	105	0	0	119	121	182	182	102	102	91	93	228	228	177	177
SAN03.01	101	103	0	0	119	123	182	182	102	110	93	111	228	228	177	177
SAN03.02	101	101	0	0	119	119	182	182	102	110	93	93	228	228	177	177
SAN03.03	101	101	192	207	119	119	182	182	102	110	91	93	228	228	177	177
SAN03.04	101	101	0	0	119	119	182	182	102	110	91	93	228	228	177	179
SAN03.05	101	101	0	0	119	119	182	182	102	110	93	93	228	228	177	179
SAN04.01	101	105	0	0	119	119	182	182	102	102	91	93	0	0	177	179
SAN04.02	105	105	0	0	119	119	182	182	102	102	93	93	0	0	177	179
SAN04.03	101	105	189	201	119	119	182	182	102	102	91	93	0	0	177	179
SAN04.04	101	105	189	201	119	119	182	182	102	102	93	93	0	0	177	179
SAN04.05	105	105	0	0	119	119	182	182	102	102	93	93	0	0	177	179
SAN05.01	101	107	192	201	119	121	182	182	102	102	93	93	0	0	177	177
SAN05.02	101	107	201	201	119	119	182	182	102	102	93	93	228	228	177	177
SAN05.03	101	107	201	201	119	119	182	182	102	102	93	93	0	0	177	177
SAN05.04	101	107	201	201	119	119	182	182	102	102	93	93	0	0	177	177
SAN05.05	101	107	201	201	119	121	182	182	102	102	93	93	228	228	177	177
SAN06.01	101	105	0	0	111	119	182	184	102	102	93	93	0	0	177	179
SAN06.02	101	105	198	201	119	119	182	184	102	102	91	93	228	232	177	179
SAN06.03	101	105	0	0	119	119	182	184	102	102	91	93	0	0	177	179
SAN06.04	101	105	0	0	119	119	182	184	102	102	93	93	0	0	177	179
